# Supplementary material
Source: PubMed Central journal article supplement (PMC4744503)
Supplement: NIHMS744658-supplement-1.pdf [file NIHMS744658-supplement-1.pdf]

Chen and Teitz-Tennenbaum et al  
Supplemental Figure 1

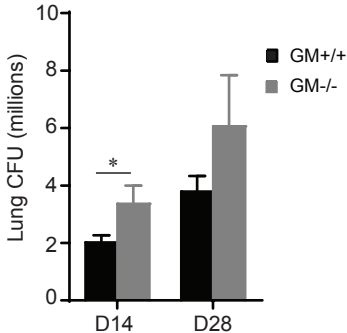

Supplemental Figure 1: Fungal clearance is impaired in GM-/- mice with cryptococcal lung infection. GM+/+ and GM-/- mice were inoculated intratracheally with  $10^4$  CFU *C. neoformans* 52D and analyzed at 14 and 28 days post infection. Aliquots from homogenized lungs were plated on Sabouraud dextrose agar in 10-fold serial dilutions, and total CFU per organ was determined. \*P < 0.05 by unpaired student t test compared with GM+/+ mice at the same time point; n =10-11 for each group, pooled from two separate experiments; values are means +/- SEM.
